# Supplementary material
Source: publisher figshare collection journal article supplement (https://springernature.figshare.com/articles/dataset/_/9847115)

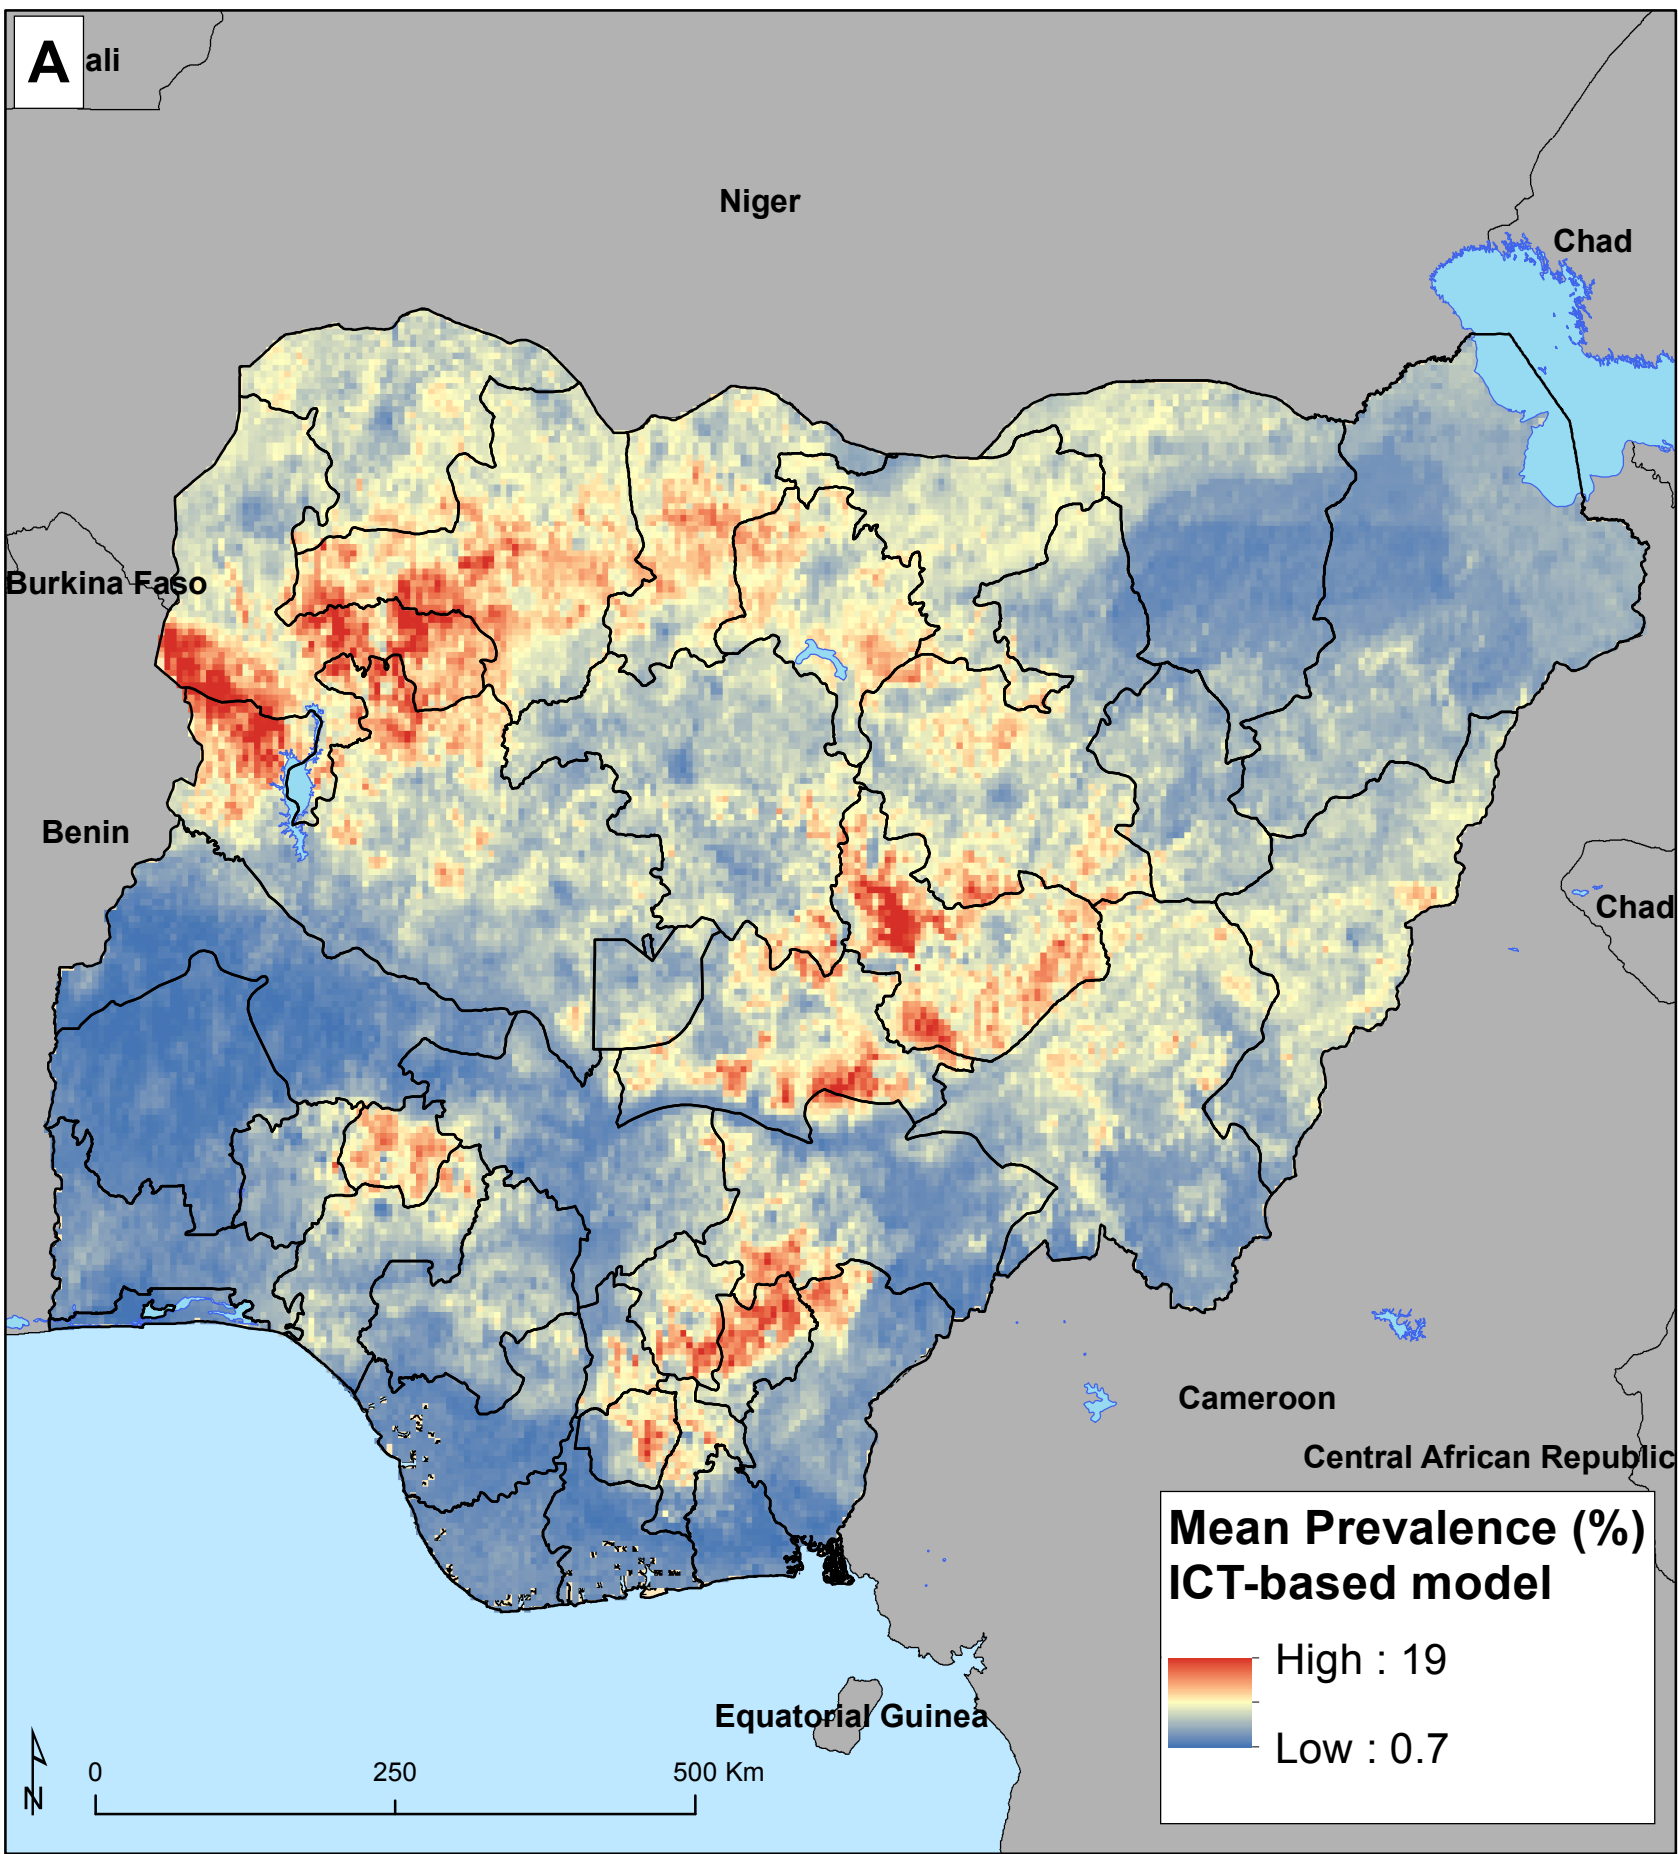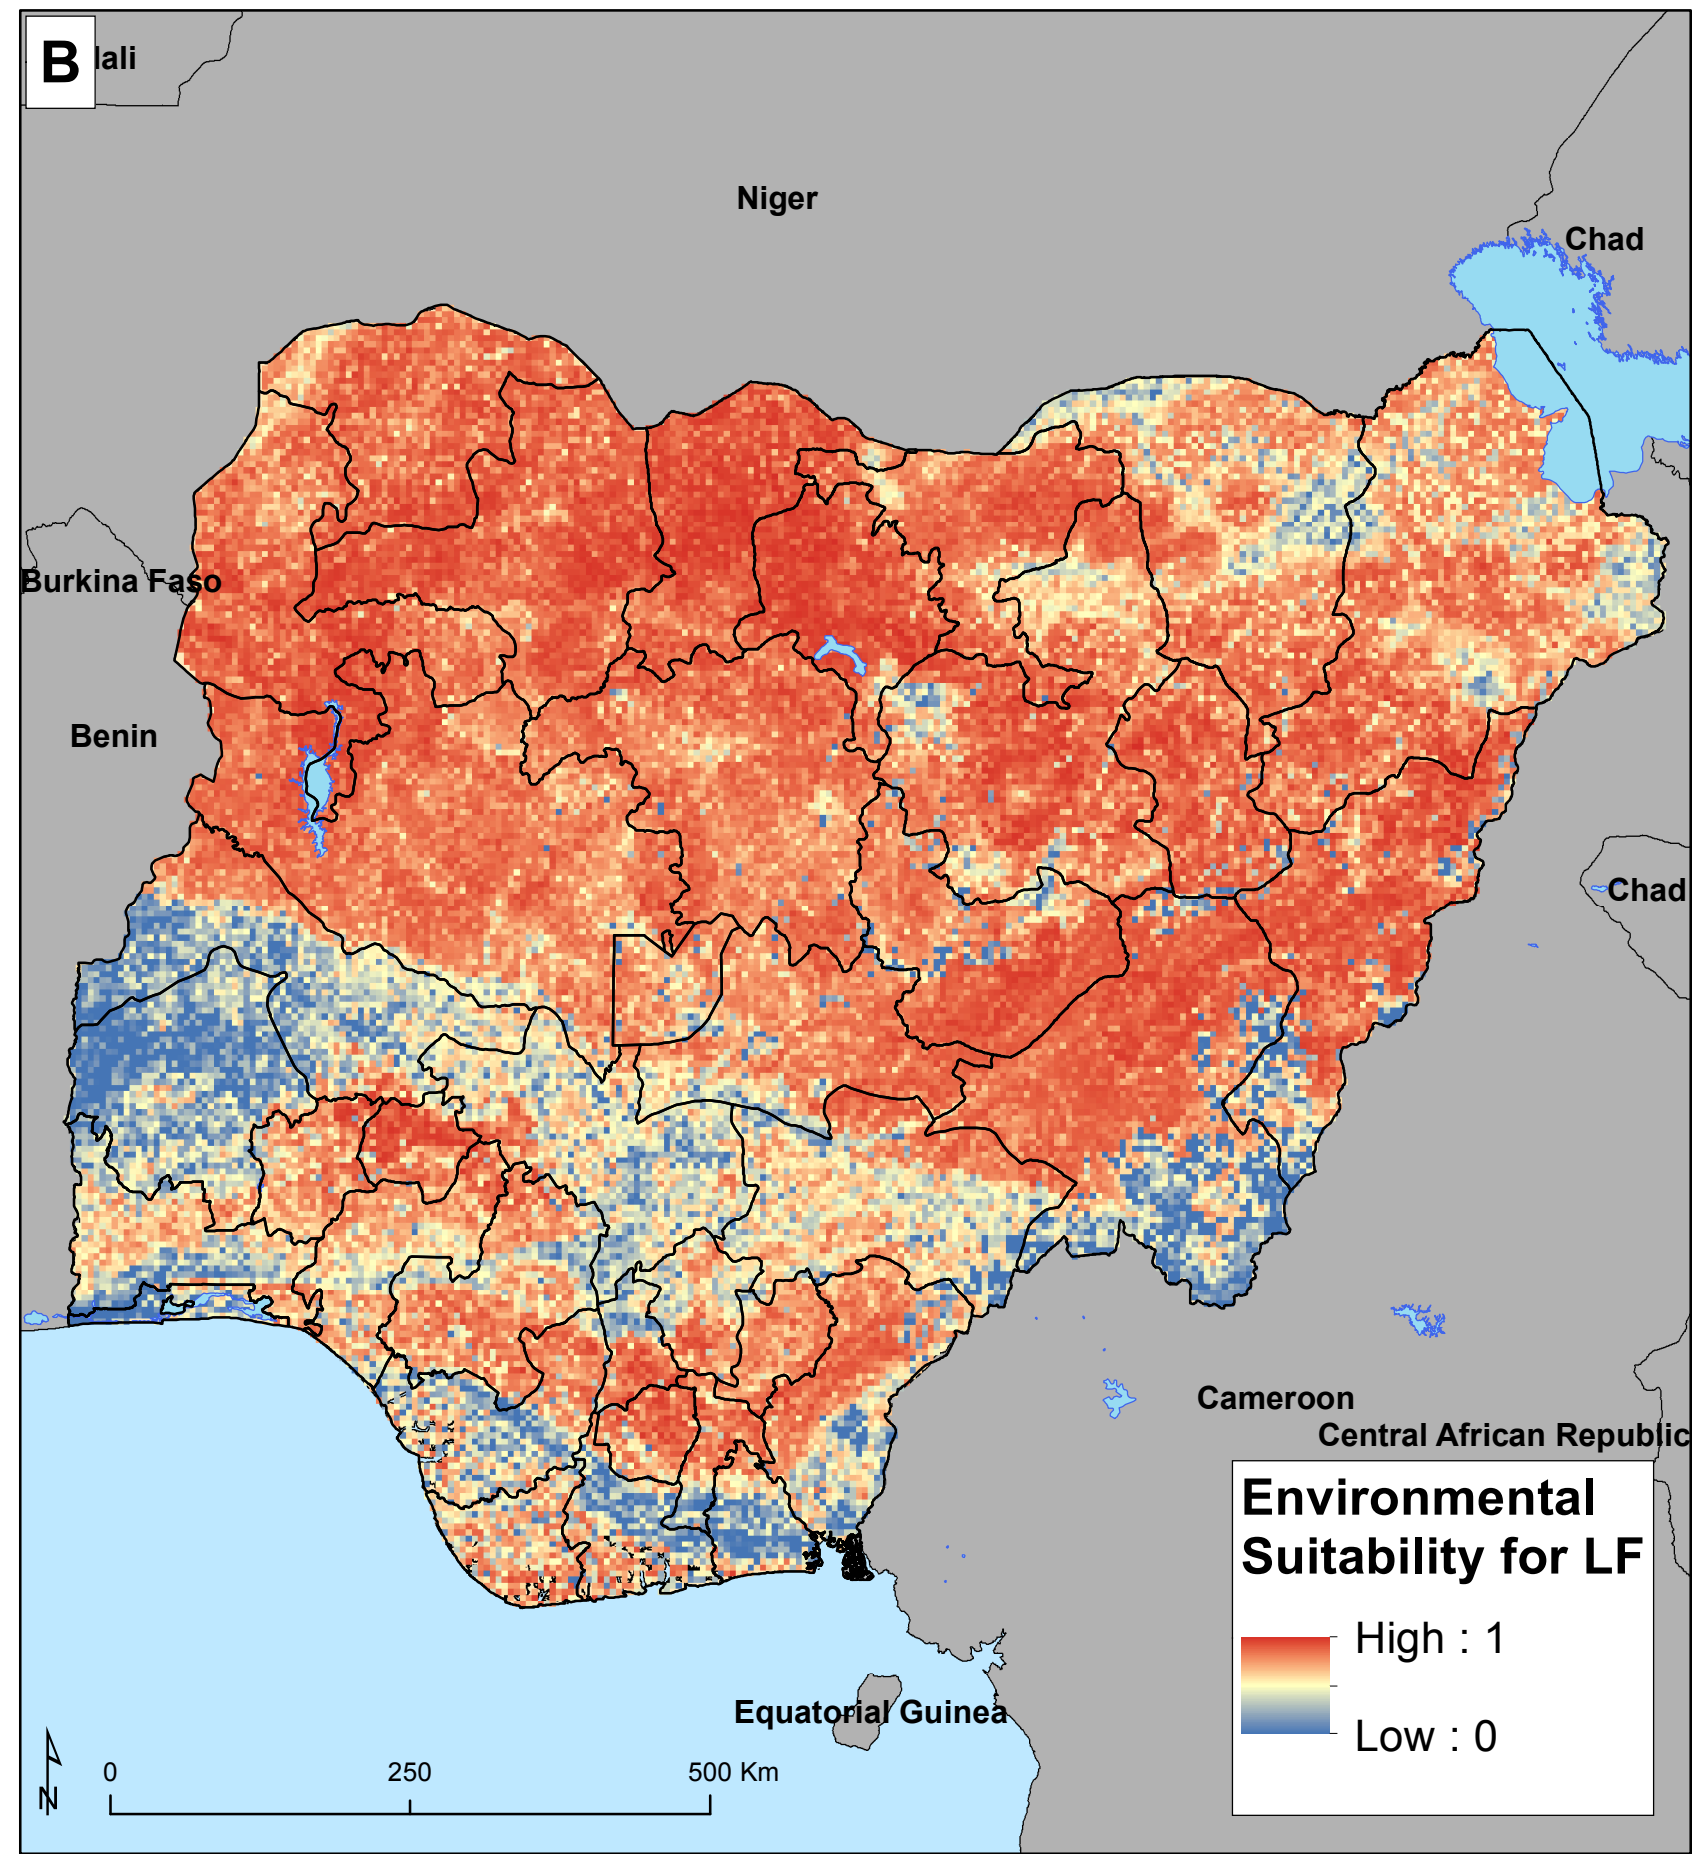

Supplement: Supplementary file [file 17654489]
